# Supplementary material
Source: Copernicus journal article supplement (doi:10.5194/egusphere-2026-1664)
Supplement: Supplementary file 1 [file egusphere-2026-1664-supplement.pdf]

1 Supplementary material

2

3 **Title: Acidification in coastal waters of Adélie Land, Antarctica (1985-2025)**

4

5 Nicolas Metzl<sup>1</sup>, Bronte Tilbrook<sup>2,3</sup>, John Akl<sup>2</sup>, Craig Neill<sup>2</sup>, Alexandra Aymard<sup>1</sup>, Claire Lo Monaco<sup>1</sup>,  
6 Gilles Reverdin<sup>1</sup>, Jean-Baptiste Sallée<sup>1</sup>, Aude Barton<sup>4</sup>, Frédéric Chevallier<sup>4</sup>, Marion Gehlen<sup>4</sup>

7

8 1 Laboratoire LOCEAN/IPSL, Sorbonne Université-CNRS-IRD-MNHN, Paris, 75005, France

9 2 CSIRO Environment, Castray Esplanade, Hobart, TAS 7004, Australia

10 3 Australian Antarctic Partnership Program, University of Tasmania, Hobart, TAS, Australia

11 4 Laboratoire LSCE/IPSL, CEA-CNRS-UVSQ, Université Paris-Saclay Gif-sur-Yvette, 91191, France

12

13 Correspondence to: Nicolas Metzl (nicolas.metzl@locean.ipsl.fr)

14

15 This document includes Table S1-S2 and Figures S1-S14 providing the supplementary information  
16 that supports part of the discussion presented in the main article.

17

18  
19  
20  
21  
22  
23  
24  
25  
26  
27  
28  
29  
30  
31  
32  
33  
34  
35  
36  
37  
38  
39  
40  
41  
42  
43  
44  
45  
46  
47  
48  
49  
50  
51  
52  
53  
54  
55  
56  
57  
58  
59  
60  
61  
62  
63  
64  
65  
66  
67  
68  
69  
70  
71  
72  
73

---

Table S1: List of cruises in the region south of 60°S from SOCAT-v2025 (Bakker et al, 2025) and new data in 2025.

---

| EXPOCODE      | Year | Month | Ship             | Principal Investigator                         | Flag |
|---------------|------|-------|------------------|------------------------------------------------|------|
| 49HH19831123  | 1984 | 1     | Hakuho Maru      | Inoue, H.                                      | D    |
| 09AR19910926  | 1991 | 10    | Aurora Australis | Tilbrook, B.                                   | B    |
| 09AR19930311  | 1993 | 3     | Aurora Australis | Tilbrook, B.                                   | C    |
| 09AR19940101  | 1994 | 1     | Aurora Australis | Tilbrook, B.                                   | B    |
| 49HH19941123  | 1994 | 12    | Hakuho Maru      | Inoue, H.                                      | D    |
| 09AR19941213  | 1995 | 1     | Aurora Australis | Tilbrook, B.                                   | B    |
| 320619950317  | 1995 | 3     | Nath. B. Palmer  | Takahashi, T. : Sweeney, C. : Sutherland, S.C. | D    |
| 09AR19950717  | 1995 | 7     | Aurora Australis | Tilbrook, B.                                   | B    |
| 09AR19950916  | 1995 | 9     | Aurora Australis | Tilbrook, B.                                   | C    |
| 09AR19960119  | 1996 | 3     | Aurora Australis | Tilbrook, B.                                   | C    |
| 09AR19960822  | 1996 | 8     | Aurora Australis | Tilbrook, B.                                   | C    |
| 353L19961021  | 1996 | 10    | L_Astrolabe      | Metzl, N.                                      | D    |
| 353L19970202  | 1997 | 2     | L_Astrolabe      | Metzl, N.                                      | D    |
| 09AR19980715  | 1998 |       | Aurora Australis | Tilbrook, B.                                   | B    |
| 61TG19990202  | 1999 | 2     | Tangaroa         | Bakker, D.                                     | D    |
| 09AR19990716  | 1999 | 8     | Aurora Australis | Tilbrook, B.                                   | B    |
| 320620001220  | 2000 | 12    | Nath. B. Palmer  | Takahashi, T. : Sweeney, C. : Sutherland, S.C. | D    |
| 320620010130  | 2001 | 2     | Nath. B. Palmer  | Takahashi, T. : Sweeney, C. : Sutherland, S.C. | B    |
| 09AR20011031  | 2001 | 10    | Aurora Australis | Tilbrook, B.                                   | B    |
| 49HH20011128  | 2002 | 1     | Hakuho Maru      | Inoue, H.                                      | D    |
| 35MF20030126* | 2003 | 2     | Marion Dufresne  | Metzl, N.                                      | D    |
| 320620041012  | 2004 | 10    | Nath. B. Palmer  | Takahashi, T. : Sweeney, C. : Sutherland, S.C. | B    |
| 353L20041230* | 2005 | 1     | L_Astrolabe      | Goyet, C.                                      | D    |
| 353L20050218* | 2005 | 2     | L_Astrolabe      | Goyet, C.                                      | D    |
| 353L20051019* | 2005 | 10    | L_Astrolabe      | Goyet, C.                                      | D    |
| 33RR20070204  | 2007 | 2     | Roger Revelle    | Wanninkhof, R.                                 | D    |
| 49QB20080125  | 2008 | 2     | Umitaka Maru     | Hashida, G.                                    | B    |
| 353L20090101* | 2009 | 1     | L_Astrolabe      | Tilbrook, B.                                   | B    |
| 353L20090109* | 2009 | 1     | L_Astrolabe      | Tilbrook, B.                                   | B    |
| 353L20090122* | 2009 | 1     | L_Astrolabe      | Tilbrook, B.                                   | B    |
| 353L20090218* | 2009 | 2     | L_Astrolabe      | Tilbrook, B.                                   | B    |
| 353L20090227* | 2009 | 2     | L_Astrolabe      | Tilbrook, B.                                   | B    |
| 353L20091021* | 2009 | 10    | L_Astrolabe      | Tilbrook, B.                                   | B    |
| 353L20091111* | 2009 | 11    | L_Astrolabe      | Tilbrook, B.                                   | B    |
| 353L20100219* | 2010 | 2     | L_Astrolabe      | Tilbrook, B.                                   | B    |
| 353L20100228* | 2010 | 2     | L_Astrolabe      | Tilbrook, B.                                   | B    |
| 353L20101021* | 2010 | 10    | L_Astrolabe      | Tilbrook, B.                                   | B    |
| 353L20101031* | 2010 | 11    | L_Astrolabe      | Tilbrook, B.                                   | B    |
| 09AR20110104  | 2011 | 1     | Aurora Australis | Tilbrook, B.                                   | B    |
| 353L20110220* | 2011 | 2     | L_Astrolabe      | Tilbrook, B.                                   | B    |
| 353L20110301* | 2011 | 3     | L_Astrolabe      | Tilbrook, B.                                   | B    |
| 09AR20120105  | 2012 | 1     | Aurora Australis | Tilbrook, B.                                   | A    |
| 353L20120107* | 2012 | 1     | L_Astrolabe      | Tilbrook, B.                                   | A    |
| 353L20120123* | 2012 | 1     | L_Astrolabe      | Tilbrook, B.                                   | B    |
| 353L20120218* | 2012 | 2     | L_Astrolabe      | Tilbrook, B.                                   | B    |
| 353L20120302* | 2012 | 3     | L_Astrolabe      | Tilbrook, B.                                   | B    |
| 353L20121013* | 2012 | 10    | L_Astrolabe      | Tilbrook, B.                                   | B    |
| 353L20121118* | 2012 | 11    | L_Astrolabe      | Tilbrook, B.                                   | B    |

|    |               |      |    |                  |                                                |   |
|----|---------------|------|----|------------------|------------------------------------------------|---|
| 74 | 49NZ20121128* | 2012 | 12 | Mirai            | Murata, A.                                     | A |
| 75 | 353L20130110  | 2013 | 1  | L_Astrolabe      | Tilbrook, B.                                   | B |
| 76 | 353L20130126  | 2013 | 1  | L_Astrolabe      | Tilbrook, B.                                   | B |
| 77 | 353L20130219* | 2013 | 2  | L_Astrolabe      | Tilbrook, B.                                   | B |
| 78 | 61TG20130202  | 2013 | 2  | Tangaroa         | Currie, K.I.                                   | C |
| 79 | 353L20130226* | 2013 | 3  | L_Astrolabe      | Tilbrook, B.                                   | B |
| 80 | 320620140129  | 2014 | 2  | Nat. B. Palmer   | Takahashi, T. : Sweeney, C. : Sutherland, S.C. | D |
| 81 | 09AR20141205  | 2015 | 1  | Aurora Australis | Tilbrook, B.                                   | B |
| 82 | 09AR20161208  | 2016 | 12 | Aurora Australis | Tilbrook, B.                                   | A |
| 83 | 09AR20161208  | 2017 | 1  | Aurora Australis | Tilbrook, B.                                   | A |
| 84 | 096U20180111  | 2018 | 2  | Investigator     | Tilbrook, B.                                   | A |
| 85 | 49KD20181212  | 2019 | 1  | Kaiyo-maru       | Nomura, D.                                     | C |
| 86 | 096U20190118  | 2019 | 1  | Investigator     | Tilbrook, B.                                   | B |
| 87 | 09AR20191201  | 2019 | 12 | Aurora Australis | Tilbrook, B.                                   | B |
| 88 | WFCH20230214  | 2023 | 2  | Le Cdt Charcot   | Wanninkhof, R. : Pierrot, D.                   | B |
| 89 | 096U20240105  | 2024 | 1  | Investigator     | Tilbrook, B. : Akl, J. : Neill, C.             | B |
| 90 | SOCISSE *     | 2024 | 12 | L_Astrolabe      | Tilbrook, B. : Akl, J                          | N |
| 91 | SOCISSE       | 2025 | 1  | L_Astrolabe      | Tilbrook, B. : Akl, J                          | N |
| 92 | SOCISSE       | 2025 | 2  | L_Astrolabe      | Tilbrook, B. : Akl, J                          | N |

93

94 (\*) For these cruises discrete or underway A<sub>T</sub> C<sub>T</sub> data available at <https://doi.org/10.17882/102337>

95

96

97  
 98  
 99  
 100  
 101  
 102  
 103  
 104  
 105  
 106  
 107  
 108  
 109  
 110  
 111  
 112  
 113  
 114  
 115  
 116  
 117  
 118  
 119  
 120  
 121  
 122  
 123  
 124  
 125  
 126  
 127  
 128  
 129

Table S2: List of cruises in the Adélie Land region (south of 63°S) from GLODAPv2.2023 (Lauvset et al, 2023, 2024) used for both surface  $C_T$  and  $C_{ant}$  estimate. The column  $C_{ant}$  identify cruises with available  $A_T$  and  $C_T$  data for  $C_{ant}$  estimates. All cruises are also used for surface data. Month indicate the season for data south of 63°S used for the trend analysis.

---

| EXPOCODE     | Year | Month | Carbon P.I. | $C_{ant}$ |
|--------------|------|-------|-------------|-----------|
| 09AR19930404 | 1993 | 4     | B. Tilbrook |           |
| 09AR19940101 | 1994 | 1     | B. Tilbrook |           |
| 49HH19941213 | 1994 | 12    | M. Ishii    | Yes       |
| 09AR19941213 | 1995 | 1     | M. Ishii    | Yes       |
| 09AR19950717 | 1995 | 7     | B. Tilbrook |           |
| 09AR19960119 | 1996 | 3     | B. Tilbrook |           |
| 09AR19960822 | 1996 | 8     | B. Tilbrook | Yes       |
| 09AR20011029 | 2001 | 11    | B. Tilbrook | Yes       |
| 49HH20011127 | 2002 | 1     | M. Ishii    |           |
| 61TG20020206 | 2002 | 2     | M. Ishii    |           |
| OISO-10      | 2003 | 2     | N. Metzl    | Yes       |
| 61TG20030217 | 2003 | 3     | M. Ishii    |           |
| 09AR20071216 | 2007 | 12    | B. Tilbrook | Yes       |
| 09AR20080322 | 2008 | 3     | B. Tilbrook | Yes       |
| 09AR20110104 | 2011 | 1     | B. Tilbrook |           |
| 09AR20120105 | 2012 | 1     | B. Tilbrook |           |
| 49NZ20121128 | 2012 | 12    | A. Murata   |           |
| 09AR20141205 | 2015 | 1     | B. Tilbrook | Yes       |
| 096U20180111 | 2018 | 1     | B. Tilbrook | Yes       |

---

130  
131  
132  
133  
134  
135

Figure S1: Sea surface  $f\text{CO}_2$  ( $\mu\text{atm}$ ) observed in December 2024/January 2025 (R2), January-February 2025 (R3) and February 2025 (R4) along the track between Hobart and Adélie Land. In this study only data south of  $63^\circ\text{S}$  are used for the trend analysis. The red dashed line is the mean atmospheric  $\text{CO}_2$  concentration in January 2025 at Cap Grim or at South Pole (422 ppm). (<https://gml.noaa.gov/dv/iadv/>).

136  
137  
138  
139  
140  
141  
142  
143  
144  
145  
146  
147  
148  
149  
150  
151

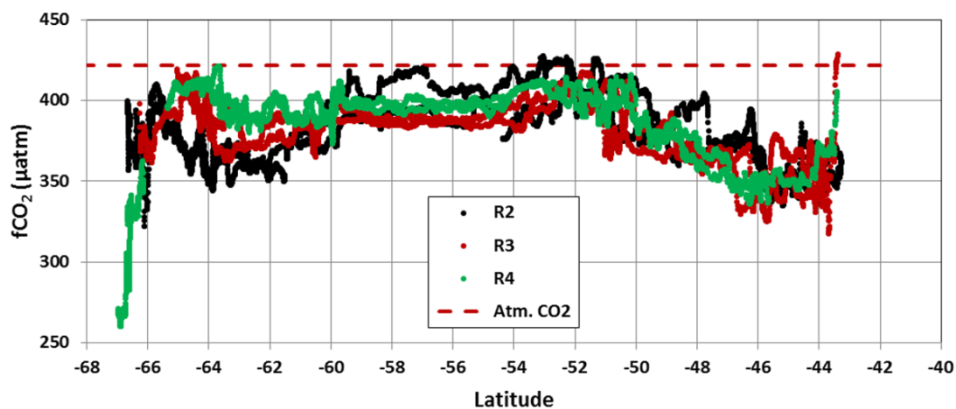

152  
153  
154

Figure S2: Sea surface  $A_T$  and  $C_T$  concentrations ( $\mu\text{mol.kg}^{-1}$ ) observed in January 2025 along the track between Hobart and Adélie Land. The red symbols indicate suspicious data. In this study only data south of  $63^\circ\text{S}$  are used.

155  
156  
157  
158  
159  
160  
161  
162  
163  
164  
165  
166  
167  
168  
169  
170  
171  
172  
173  
174  
175  
176  
177  
178  
179  
180

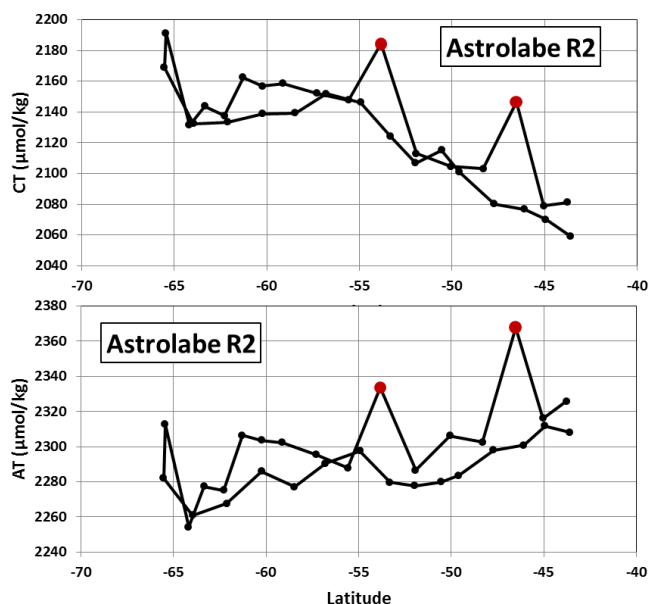

181  
182  
183  
184  
185  
186  
187  
188  
189  
190  
191  
192  
193  
194  
195  
196  
197  
198  
199  
200  
201  
202

Figure S3: Sea surface silicates (black circles) and phosphates (open circles) concentrations ( $\mu\text{mol.kg}^{-1}$ ) observed in February 2003 along the track between Hobart and Adélie Land (OISO-10 cruise). At high latitudes values for silicates of  $40 \mu\text{mol.kg}^{-1}$  and phosphates of  $2 \mu\text{mol.kg}^{-1}$  were used for pH and  $\Omega_{\text{ar}}$  calculations using CO2sys.

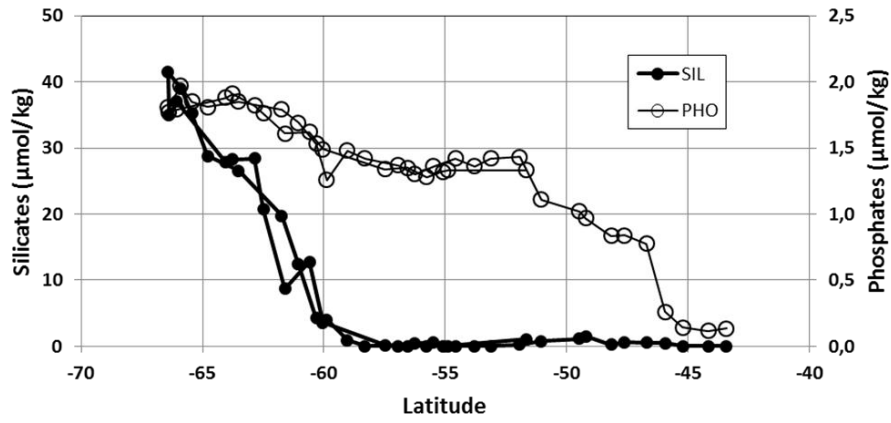

203  
204  
205  
206  
207  
208  
209  
210  
211  
212  
213  
214  
215  
216  
217  
218  
219  
220  
221  
222  
223  
224  
225  
226  
227  
228  
229  
230  
231  
232  
233  
234  
235  
236  
237  
238  
239  
240  
241  
242  
243  
244  
245  
246  
247  
248  
249  
250  
251  
252  
253  
254

Figure S4: (a) Sea surface  $A_T$  distribution (color code in  $\mu\text{mol.kg}^{-1}$ ) in the region from GLODAP and SNAPO-CO2 data available between 1995 and 2018. (b)  $A_T$  ( $\mu\text{mol.kg}^{-1}$ ) versus salinity from these data and used to calculate the  $A_T$ /salinity relationship (red dashed). Also shown are the relationships from Stark et al (2018), Lee et al (2006) or using only GLODAP data (green). Figure (a) produced with ODV (Schlitzer, 2018).

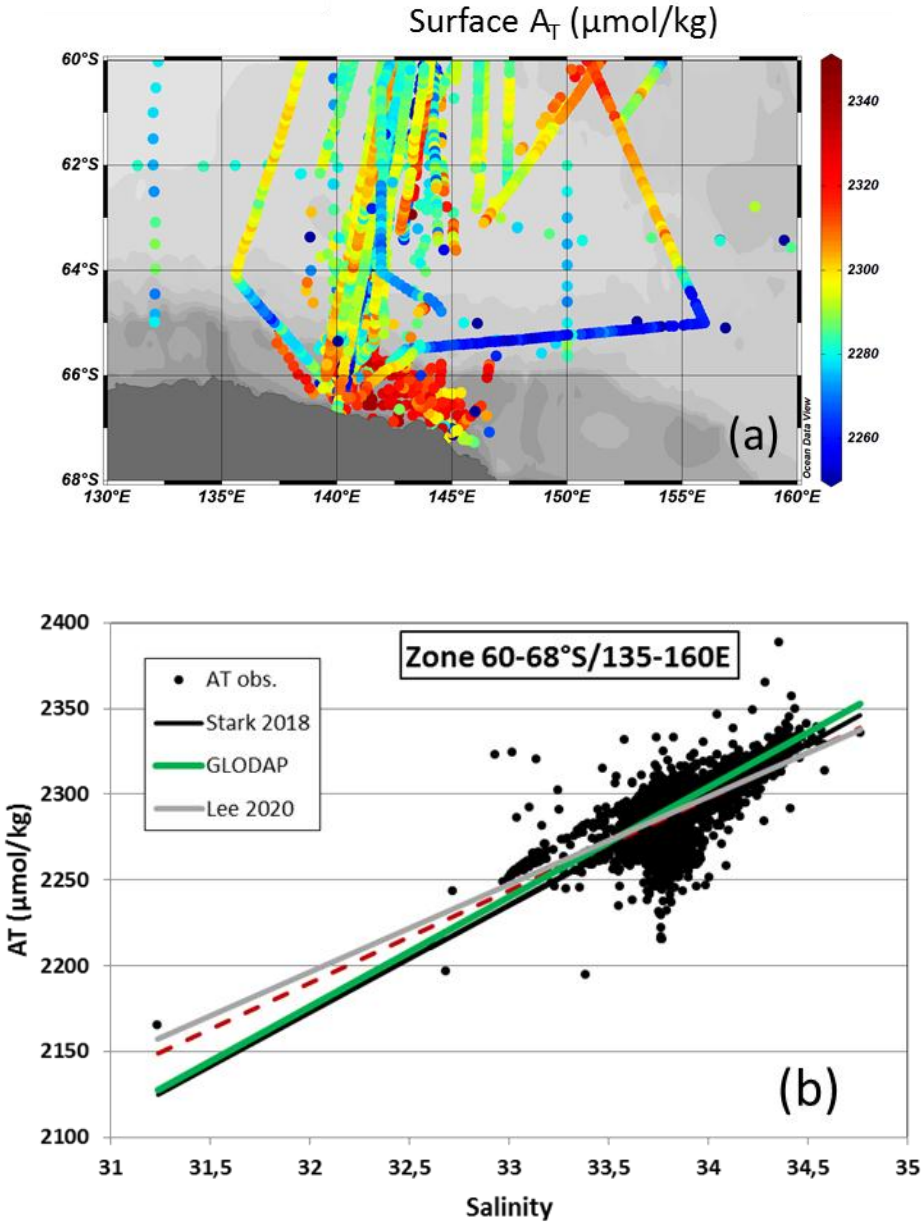

255  
256  
257  
258  
259

Figure S5: Maps of surface Chl-a concentration ( $\text{mg}\cdot\text{m}^{-3}$ ) in January 2025, 2024 and 2002. Figures produced with ODV (Schlitzer, 2018) from data downloaded at <https://resources.marine.copernicus.eu/> (OCEANCOLOUR\_GLO\_BGC\_L4\_MY\_009\_104), last access, 29-July-2025.

260  
261  
262  
263  
264  
265  
266  
267  
268  
269  
270  
271  
272  
273  
274  
275  
276  
277  
278  
279  
280  
281  
282  
283  
284  
285  
286  
287  
288  
289  
290  
291  
292  
293  
294  
295  
296  
297  
298  
299  
300  
301  
302  
303  
304  
305

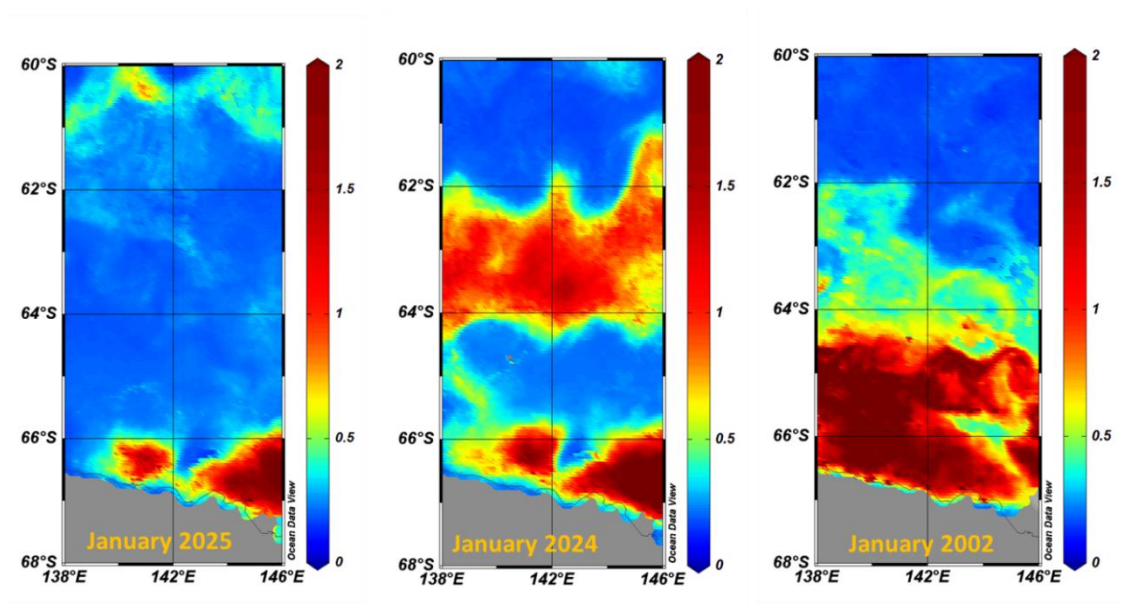

306  
307  
308  
309  
310  
311  
312  
313  
314  
315  
316  
317  
318  
319  
320  
321  
322  
323  
324  
325  
326  
327  
328  
329  
330  
331  
332  
333  
334  
335  
336  
337  
338  
339  
340  
341  
342  
343  
344  
345  
346  
347  
348  
349  
350  
351  
352  
353  
354  
355  
356  
357

Figure S6: Same as figure 6 for the period 2000-2006 to highlight the anomaly in 2002. Time-series of (a) sea surface  $f\text{CO}_2$  ( $\mu\text{atm}$ ) and (b)  $C_T$  ( $\mu\text{mol.kg}^{-1}$ ) observed south of  $65^\circ\text{S}$  based on SOCAT  $f\text{CO}_2$  data in summer (grey circles) and from  $A_T C_T$  data in summer (orange triangles) Also shown are the monthly values of the FFNN model (purple) and Chl-a concentrations (green,  $\text{mg.m}^{-3}$ ) at the same location. The red line in (a) is the atmospheric  $f\text{CO}_2$ .

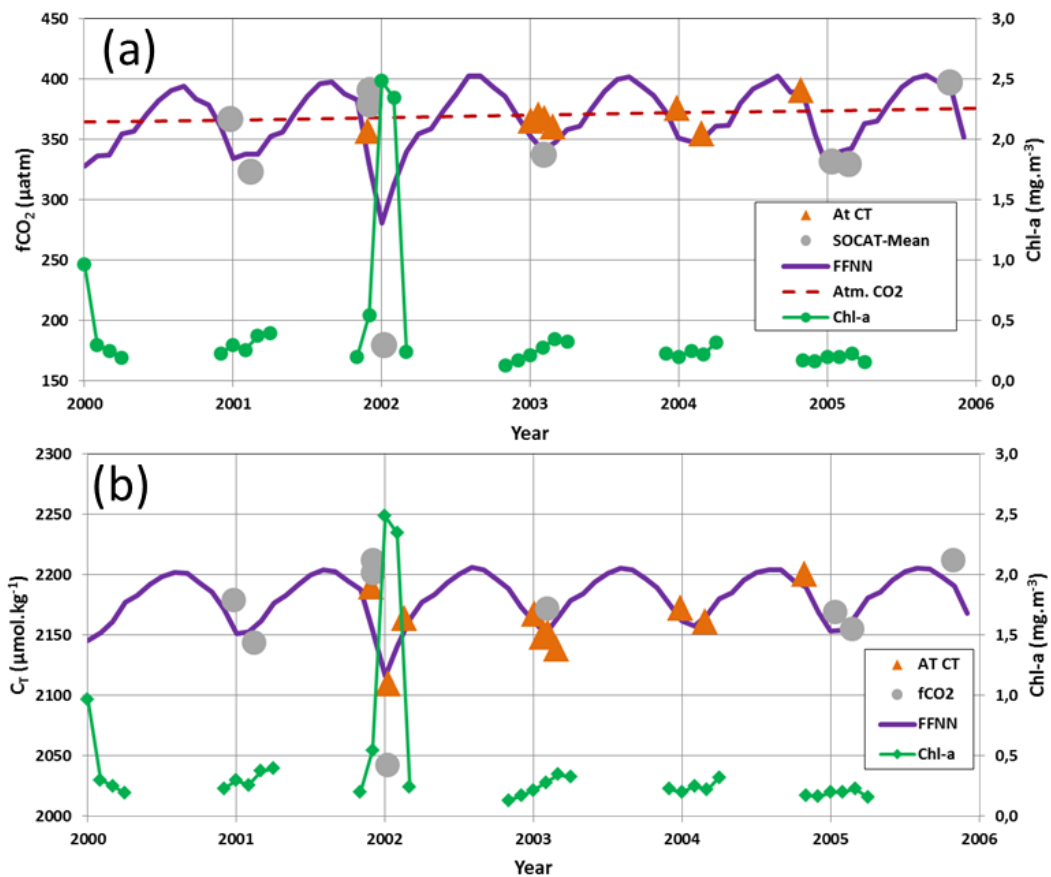

358  
359  
360  
361  
362  
363  
364  
365  
366  
367  
368  
369  
370  
371  
372  
373  
374  
375  
376  
377  
378  
379

Figure S7: Time-series of air-sea CO<sub>2</sub> fluxes (mmolC.m<sup>-2</sup>.d<sup>-1</sup>) in January 1996-2025 from the FFNN model (centered at 65°S-140°E) and of the Chl-a concentrations (green, mg.m<sup>-3</sup>) at the same location. When Chl-a was high (e.g. 2002, 2015) the ocean was a stronger CO<sub>2</sub> sink.

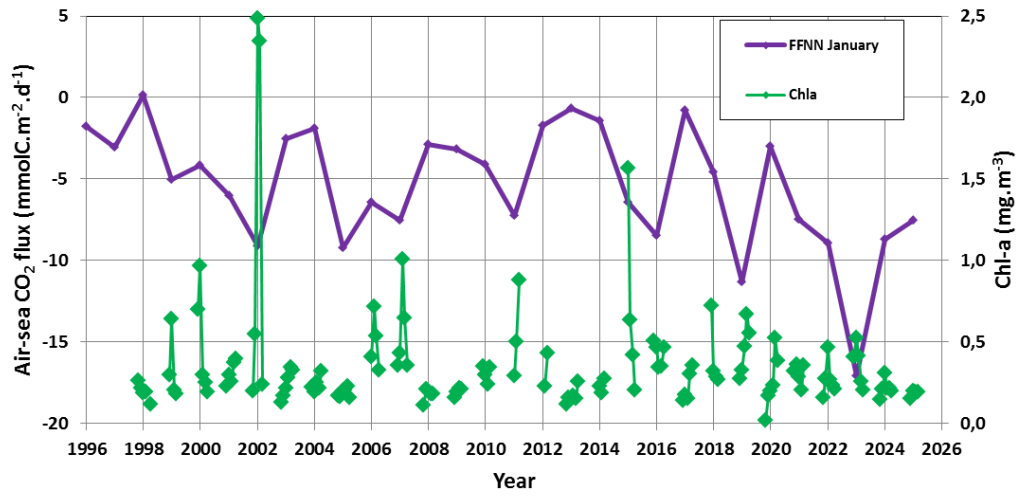

380  
381  
382  
383  
384  
385  
386  
387  
388  
389  
390  
391  
392  
393  
394  
395  
396  
397  
398  
399  
400  
401  
402  
403  
404  
405  
406  
407  
408  
409  
410  
411

Figure S8: Maps of  $\Omega_{ar}$  in January 2023 (left) and August 2023 (right) in the Adélie Land region based on the FFNN model. Note the different scales. During austral winter  $\Omega_{ar} < 1.3$ . In summer  $\Omega_{ar}$  presents high variability linked to biological processes. Figures produced with ODV (Schlitzer, 2018).

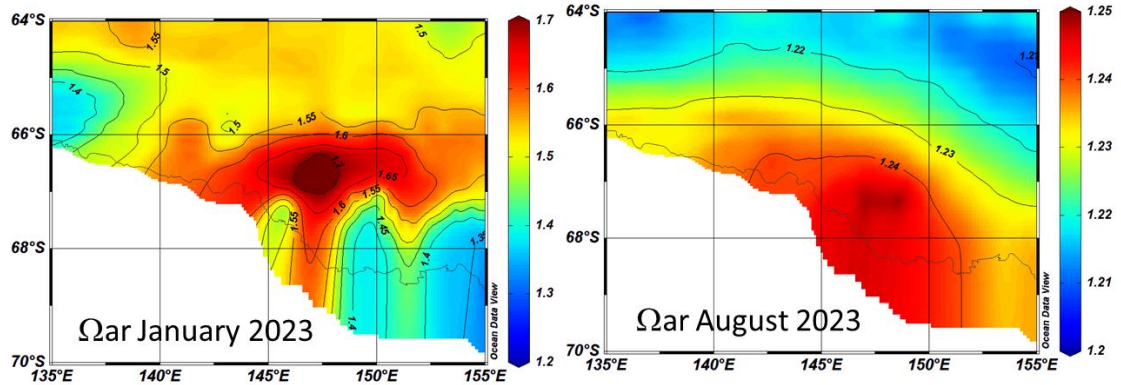

412  
413  
414  
415  
416  
417  
418  
419  
420  
421  
422  
423  
424  
425  
426  
427  
428  
429  
430  
431  
432  
433  
434  
435  
436  
437  
438  
439  
440  
441  
442  
443  
444

Figure S9: Time-series of (a) air-sea CO<sub>2</sub> fluxes (mmolC.m<sup>-2</sup>.d<sup>-1</sup>) and (b) Ω<sub>ar</sub> in 1985-2025 from the FFNN model (centered at 65°S-140°E) in January (red) and August (blue). Dashed lines are the trends for each season (see Table 3). Here, we highlight the variability in austral summer.

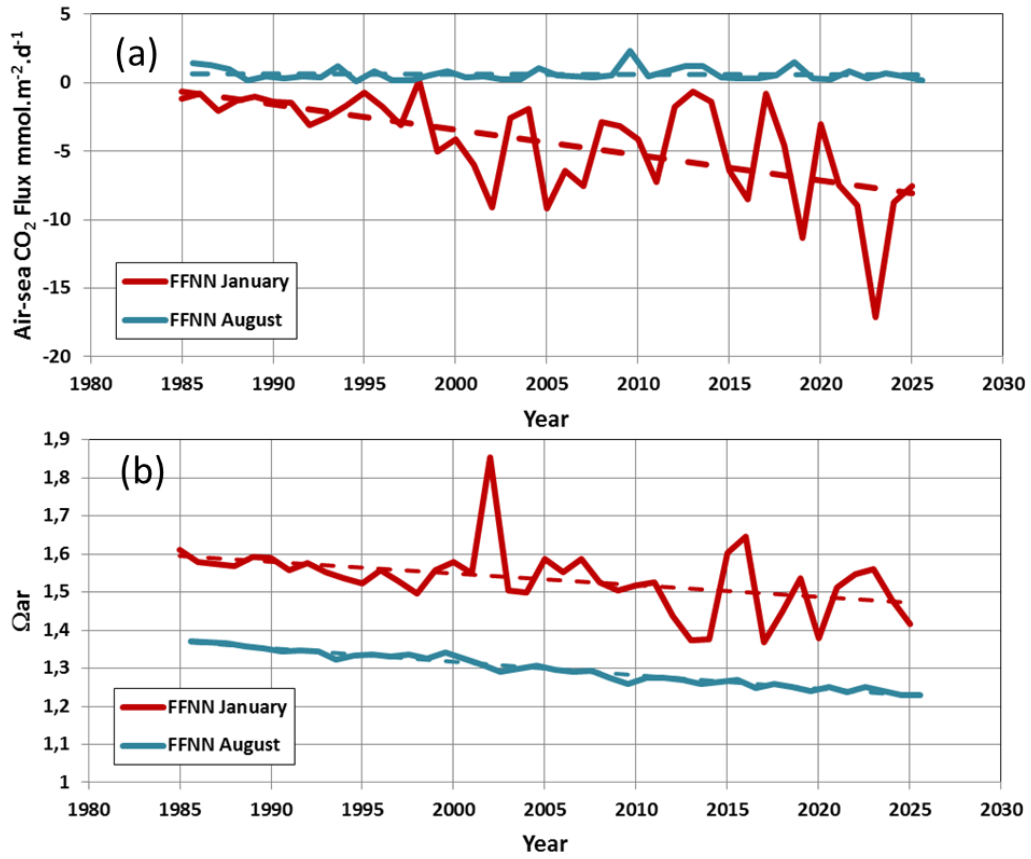

445  
446  
447  
448  
449  
450  
451  
452  
453  
454  
455  
456  
457  
458  
459  
460  
461  
462  
463  
464  
465  
466  
467  
468  
469  
470

Figure S10: Time-series of the seasonal difference (August-January) for  $f\text{CO}_2$  and  $C_T$  based on the FFNN model (centered at  $65^\circ\text{S}$ - $140^\circ\text{E}$ ). The differences present high variability starting in 1998 when the model is constrained by Chl-a satellite data. No significant trends were observed but the seasonal amplitude was variable around 2000-2008 and 2015-2023.

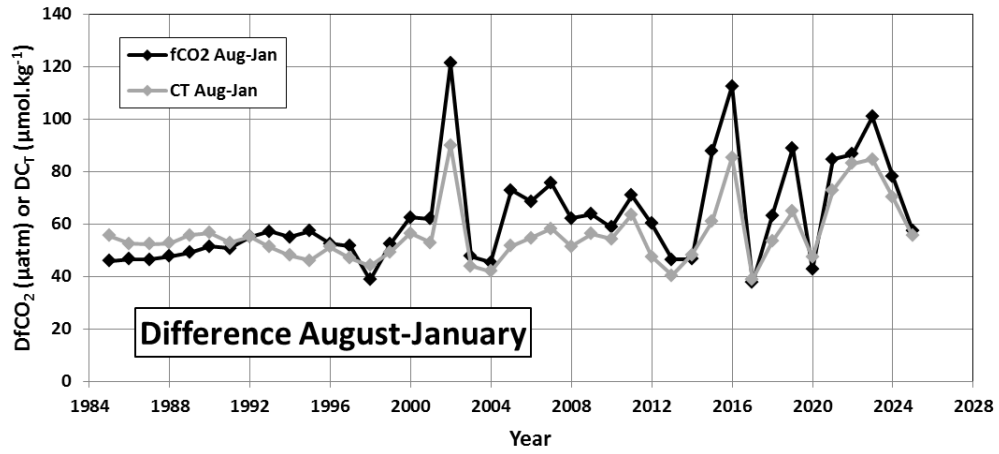

471  
472 Figure S11: Time-series of Chl-a concentrations ( $\text{mg}\cdot\text{m}^{-3}$ ) and  $C_{\text{ant}}$  ( $\mu\text{mol}\cdot\text{kg}^{-1}$ ) derived from the BGC-  
473 Argo float (WMO 2903867) from January 2024 to February 2025. The  $C_{\text{ant}}$  concentrations are  
474 estimated below 100m and only for good  $\text{pH}_T$  data (Jan-2024/Jan-2025). Dots indicate the location of  
475 data. Figures produced with ODV (Schlitzer, 2018).  
476

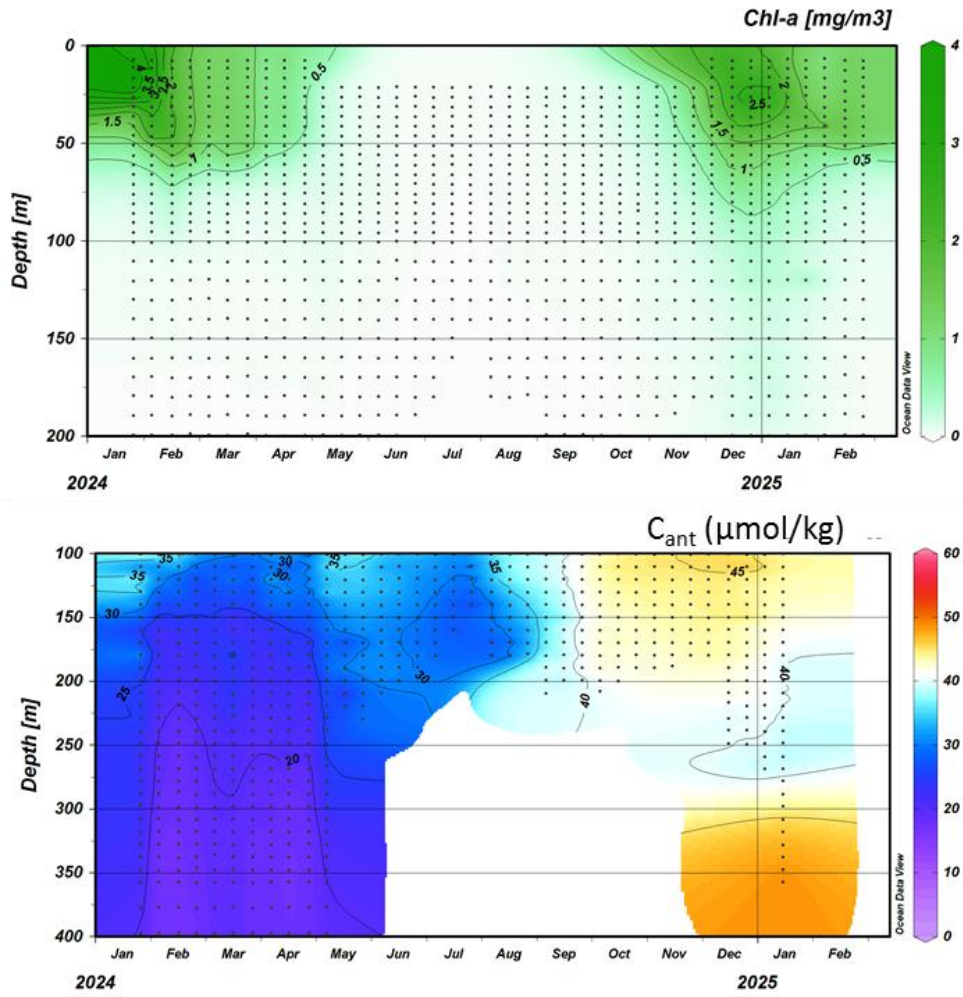

523  
 524 Figure S12: (a): Time-series of (a) Potential temperature ( $^{\circ}\text{C}$ ), (b) salinity, (c) Oxygen ( $\mu\text{mol.kg}^{-1}$ ) and  
 525 (d)  $C_T$  ( $\mu\text{mol.kg}^{-1}$ ) observed in 3 layers (below 100m) from 1994 to 2024. The trends are represented  
 526 by dashed lines (see Table 4). In (d) are also shown the  $C_T$  concentrations in surface in August from  
 527 the FFNN model (purple and dashed purple line is the  $C_T$  trend of  $0.46 \mu\text{mol.kg}^{-1}.\text{yr}^{-1}$ ). In 2013 an  
 528 anomaly is identified for all properties in subsurface and sea surface  $C_T$  from the FFNN model is also  
 529 slightly higher in 2013.  
 530  
 531  
 532

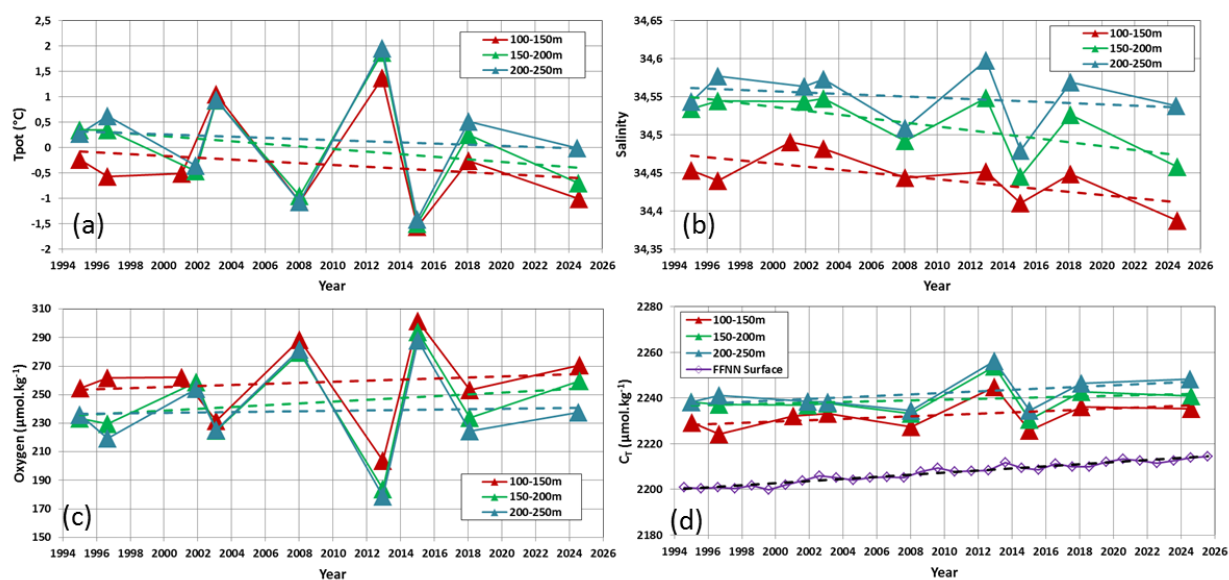

540  
 541  
 542  
 543  
 544  
 545  
 546  
 547  
 548  
 549  
 550  
 551 Figure S13: Sea surface  $\delta^{13}\text{C}$  (per mill) observed in August 1996, January 2003 and January 2025  
 552 south of  $62^{\circ}\text{S}$  in the Adélie Land region. The decrease of  $\delta^{13}\text{C}$  from 2003 to 2025 (same season) of -  
 553 0.27 on average is linked to the anthropogenic  $\text{CO}_2$  uptake (i.e. a Suess effect of  $-0.0123.\text{yr}^{-1}$ ).  
 554  
 555

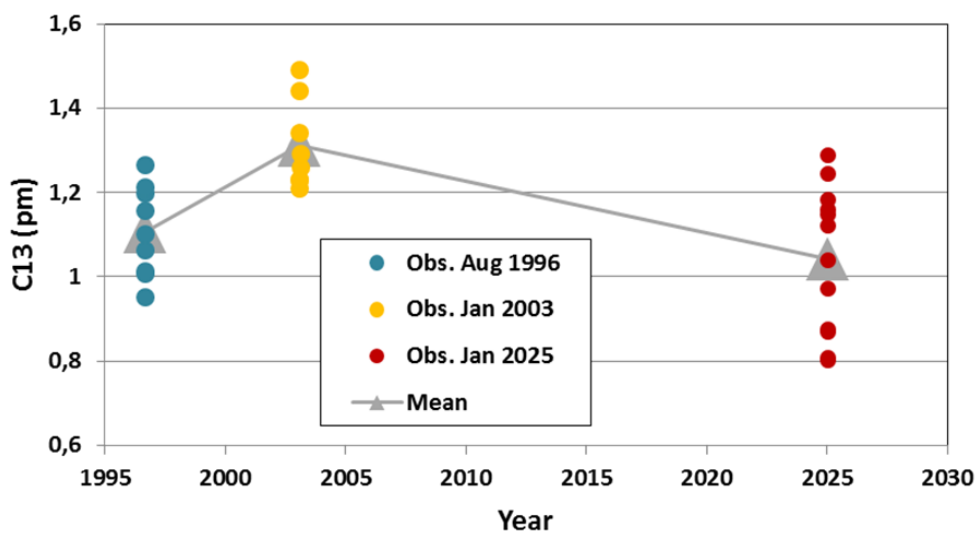

575 Figure S14: Time-series of  $C_T$  concentrations ( $\mu\text{mol.kg}^{-1}$ ) based on the FFNN model (purple) and the  
 576 reconstruction for August using  $C_{\text{ant}}$  fitted ( $C_{\text{ant}}$  fit, red line, see Eq. 2,) and their difference (grey right  
 577 axis). The dashed line is the FFNN trend ( $0.44 \mu\text{mol.kg}^{-1}.\text{yr}^{-1}$ ).  
 578  
 579  
 580

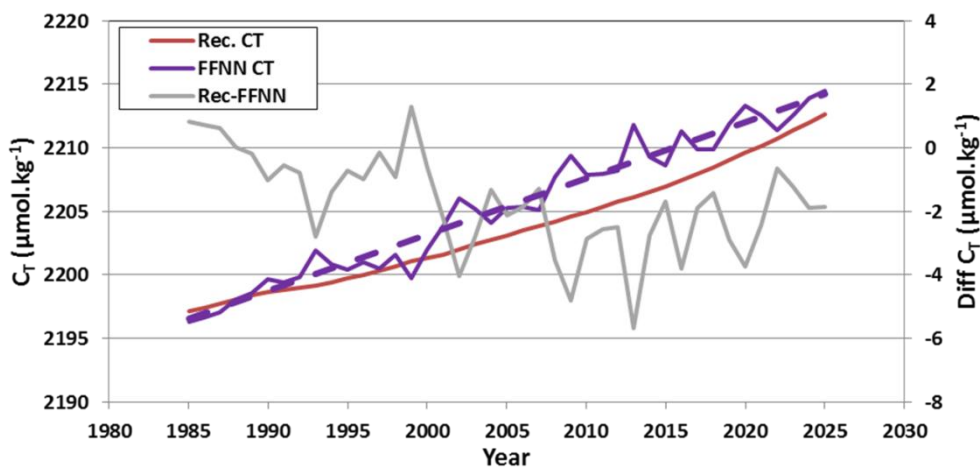

581  
582  
583  
584  
585  
586  
587  
588  
589  
590  
591  
592  
593  
594  
595  
596  
597  
598  
599  
600  
601  
602  
603  
604  
605  
606  
607  
608  
609  
610  
611
